# Supplementary material for: Influence of water on the retention of methyl tertiary-butyl ether by high silica ZSM-5 and Y zeolites: a multidisciplinary study on the adsorption from liquid and gas phase
Source: Royal Society of Chemistry journal article supplement (doi:10.1039/c5ra15201a), 2015-01-01
Supplement: c5ra15201a1.pdf [file c5ra15201a1.pdf]

## Supplementary Information

**Influence of water on the retention of methyl tertiary butyl ether by high silica**

**ZSM-5 and Y zeolites: a multidisciplinary study on the adsorption from liquid and gas phase.**

A. Martucci<sup>a</sup>, I. Braschi<sup>\*\*b</sup>, C. Bisio<sup>c</sup>, E. Sarti<sup>d</sup>, E. Rodeghero<sup>a</sup>, R. Bagatin<sup>e</sup>, L. Pasti<sup>\*d</sup>

- 
- a. Department of Physics and Earth Sciences Department, University of Ferrara, Via Saragat, 1, I-44123 Ferrara, Italy.*
  - b. Department of Agricultural Sciences, University of Bologna, Viale Fanin 44 - 40127 Bologna, Italy.*
  - c. Department of Sciences and Technological Innovation, Viale Teresa Michel 11, University of Eastern Piedmont, A. Avogadro, I-15121 Alessandria, Italy*
  - d. Department of Chemistry and Pharmaceutical Sciences, University of Ferrara, Via L. Borsari, 46, I-44123 Ferrara, Italy*
  - e. Research Center for Non-Conventional Energy – Istituto Eni Donegani Environmental Technologies, via Felice Maritano, 26, San Donato Milanese, I-20097 Milan, Italy*

### Rietveld refinements details.

The background curves were fitted by Chebyshev polynomials with 16 coefficients. The diffraction peak profiles were modelled by a pseudo-Voigt function with one Gaussian and two Lorentzian broadening coefficients and the peak intensity cut-off was set to 0.1% of the peak maximum. During the refinement of the atomic coordinates, soft-restraints were applied to the Si–O distances [ $\text{Si–O} = 1.605 \pm 0.010 \text{ \AA}$ ] with the constraint weight being progressively lowered until a minimal value. The isotropic displacement parameters were constrained in the following way: the same value for all tetrahedral cations, a second value for all framework oxygen atoms, a third one for the MTBE species and a fourth one for the residual water molecules.

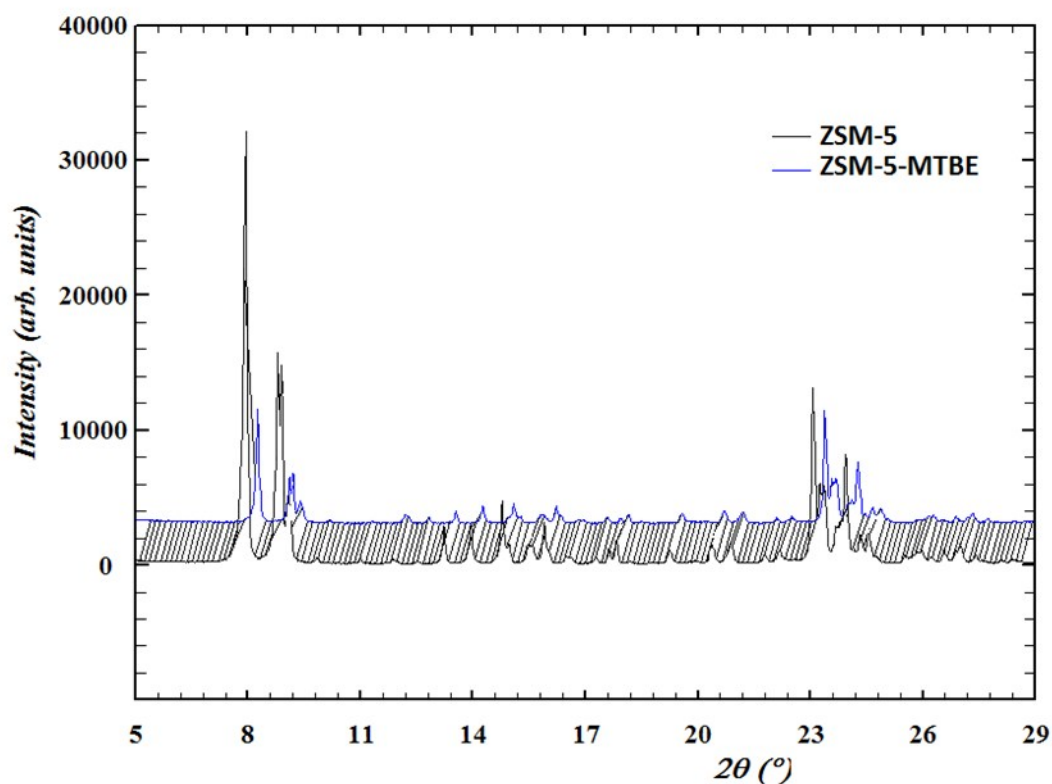

**Figure 1 SI.** Observed powder diffraction patterns of bare (ZSM-5, blue line) and MTBE loaded ZSM-5 (ZSM-5-MTBE, blue line), showing the differences both in the intensity and position of the diffraction peaks.

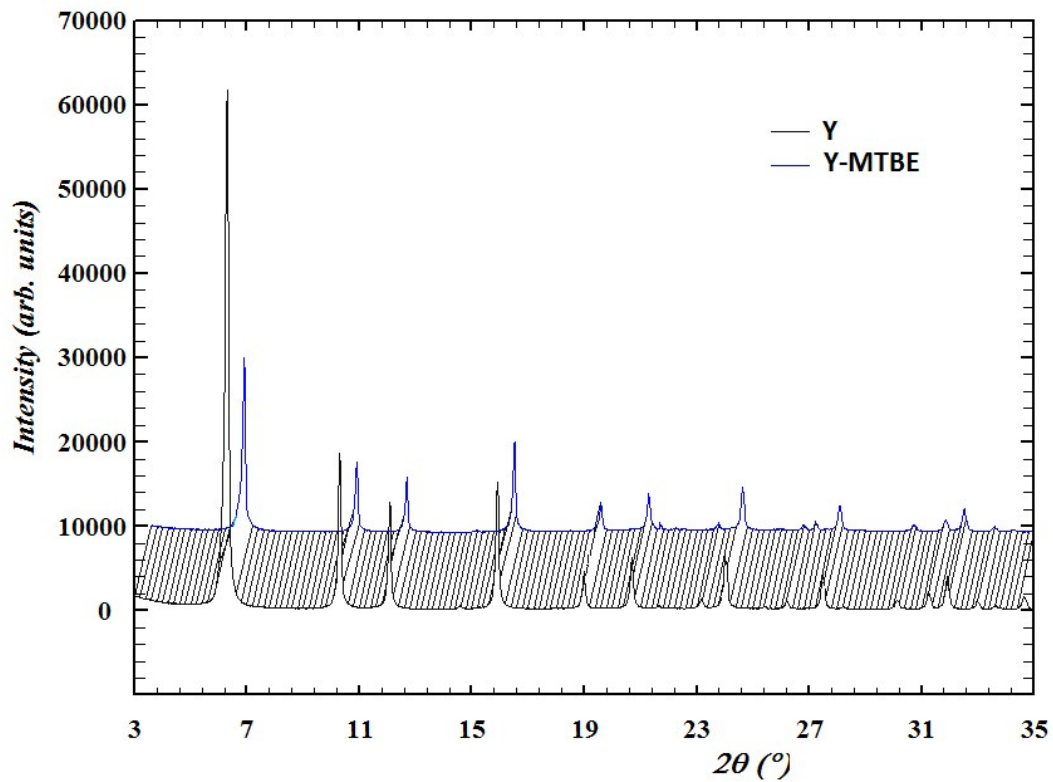

**Figure 2 SI.** Observed powder diffraction patterns of bare (Y, blue line) and MTBE loaded Y (Y-MTBE, blue line), showing the differences both in the intensity and position of the diffraction peaks.

Table 1 SI. Atomic coordinates, fractions and thermal parameters of ZSM-5-MTBE.

|            | <b>x/a</b>   | <b>y/b</b>  | <b>z/c</b>  | <b>Ui/Ue*100</b> | <b>Fraction</b> |
|------------|--------------|-------------|-------------|------------------|-----------------|
| <b>T1</b>  | 0.05485(26)  | 0.42432(31) | -0.3276(6)  | 0.14(1)          | 1.00            |
| <b>T2</b>  | 0.03485(30)  | 0.31865(38) | -0.1673(6)  | 0.14(1)          | 1.00            |
| <b>T3</b>  | 0.06516(35)  | 0.28024(23) | 0.0455(7)   | 0.14(1)          | 1.00            |
| <b>T4</b>  | 0.06455(27)  | 0.12526(22) | 0.0376(6)   | 0.14(1)          | 1.00            |
| <b>T5</b>  | 0.02996(24)  | 0.07265(29) | -0.1719(7)  | 0.14(1)          | 1.00            |
| <b>T6</b>  | 0.06110(33)  | 0.19554(34) | -0.3046(6)  | 0.14(1)          | 1.00            |
| <b>T7</b>  | -0.17119(25) | 0.42693(27) | -0.3237(6)  | 0.14(1)          | 1.00            |
| <b>T8</b>  | -0.12353(26) | 0.31133(31) | -0.1799(6)  | 0.14(1)          | 1.00            |
| <b>T9</b>  | -0.17488(27) | 0.26983(22) | 0.0293(6)   | 0.14(1)          | 1.00            |
| <b>T10</b> | -0.17781(22) | 0.11384(24) | 0.0313(7)   | 0.14(1)          | 1.00            |
| <b>T11</b> | -0.12786(23) | 0.06556(31) | -0.1749(7)  | 0.14(1)          | 1.00            |
| <b>T12</b> | -0.16412(27) | 0.18672(30) | -0.3108(6)  | 0.14(1)          | 1.00            |
| <b>T13</b> | 0.44295(27)  | 0.42349(29) | -0.3283(6)  | 0.14(1)          | 1.00            |
| <b>T14</b> | 0.47469(28)  | 0.31202(36) | -0.1810(5)  | 0.14(1)          | 1.00            |
| <b>T15</b> | 0.44046(32)  | 0.28009(25) | 0.0416(6)   | 0.14(1)          | 1.00            |
| <b>T16</b> | 0.43268(29)  | 0.12310(28) | 0.0344(6)   | 0.14(1)          | 1.00            |
| <b>T17</b> | 0.47275(25)  | 0.07612(37) | -0.1836(7)  | 0.14(1)          | 1.00            |
| <b>T18</b> | 0.44035(27)  | 0.19127(29) | -0.3180(8)  | 0.14(1)          | 1.00            |
| <b>T19</b> | 0.67261(23)  | 0.42120(29) | -0.3117(5)  | 0.14(1)          | 1.00            |
| <b>T20</b> | 0.63309(27)  | 0.31026(37) | -0.1686(6)  | 0.14(1)          | 1.00            |
| <b>T21</b> | 0.67142(23)  | 0.27247(24) | 0.0470(5)   | 0.14(1)          | 1.00            |
| <b>T22</b> | 0.67166(26)  | 0.11650(26) | 0.0330(6)   | 0.14(1)          | 1.00            |
| <b>T23</b> | 0.63050(26)  | 0.07350(38) | -0.1864(6)  | 0.14(1)          | 1.00            |
| <b>T24</b> | 0.68116(29)  | 0.19340(36) | -0.3030(7)  | 0.14(1)          | 1.00            |
| <b>O1</b>  | 0.06334(54)  | 0.37966(55) | -0.2299(9)  | 0.28(1)          | 1.00            |
| <b>O2</b>  | 0.06509(65)  | 0.32098(36) | -0.0566(7)  | 0.28(1)          | 1.00            |
| <b>O3</b>  | 0.05456(46)  | 0.20323(18) | 0.0224(10)  | 0.28(1)          | 1.00            |
| <b>O4</b>  | 0.06687(45)  | 0.08974(58) | -0.0688(8)  | 0.28(1)          | 1.00            |
| <b>O5</b>  | 0.05315(54)  | 0.12381(40) | -0.2557(10) | 0.28(1)          | 1.00            |
| <b>O6</b>  | 0.05612(70)  | 0.25079(50) | -0.2196(6)  | 0.28(1)          | 1.00            |
| <b>O7</b>  | -0.15476(60) | 0.37207(53) | -0.2411(10) | 0.28(1)          | 1.00            |
| <b>O8</b>  | -0.15946(70) | 0.30563(45) | -0.0743(6)  | 0.28(1)          | 1.00            |
| <b>O9</b>  | -0.16576(43) | 0.19157(19) | 0.0169(11)  | 0.28(1)          | 1.00            |
| <b>O10</b> | -0.16620(43) | 0.07643(40) | -0.0722(7)  | 0.28(1)          | 1.00            |
| <b>O11</b> | -0.15587(46) | 0.11678(43) | -0.2561(10) | 0.28(1)          | 1.00            |
| <b>O12</b> | -0.13446(57) | 0.24415(51) | -0.2411(9)  | 0.28(1)          | 1.00            |
| <b>O13</b> | -0.04502(25) | 0.32337(47) | -0.1630(14) | 0.28(1)          | 1.00            |
| <b>O14</b> | -0.04937(19) | 0.07777(54) | -0.1580(12) | 0.28(1)          | 1.00            |
| <b>O15</b> | 0.12130(24)  | 0.41961(39) | -0.3927(7)  | 0.28(1)          | 1.00            |
| <b>O16</b> | -0.00770(26) | 0.39853(67) | -0.3920(10) | 0.28(1)          | 1.00            |
| <b>O17</b> | -0.13638(29) | 0.40681(46) | -0.4262(8)  | 0.28(1)          | 1.00            |

|            |              |              |             |          |         |
|------------|--------------|--------------|-------------|----------|---------|
| <b>O18</b> | 0.13225(30)  | 0.20067(63)  | -0.3578(6)  | 0.28(1)  | 1.00    |
| <b>O19</b> | 0.00281(36)  | 0.20699(58)  | -0.3853(8)  | 0.28(1)  | 1.00    |
| <b>O20</b> | -0.12480(43) | 0.18536(56)  | -0.4139(6)  | 0.28(1)  | 1.00    |
| <b>O21</b> | 0.04914(59)  | -0.00092(30) | -0.2053(4)  | 0.28(1)  | 1.00    |
| <b>O22</b> | -0.13985(42) | -0.00852(32) | -0.2134(6)  | 0.28(1)  | 1.00    |
| <b>O23</b> | -0.25050(19) | 0.43143(43)  | -0.3405(6)  | 0.28(1)  | 1.00    |
| <b>O24</b> | -0.24175(24) | 0.20067(57)  | -0.3323(10) | 0.28(1)  | 1.00    |
| <b>O25</b> | -0.25010(21) | 0.28579(44)  | 0.0616(7)   | 0.28(1)  | 1.00    |
| <b>O26</b> | -0.25291(17) | 0.10150(47)  | 0.0673(9)   | 0.28(1)  | 1.00    |
| <b>O27</b> | 0.44397(47)  | 0.37698(45)  | -0.2319(10) | 0.28(1)  | 1.00    |
| <b>O28</b> | 0.45584(65)  | 0.31080(52)  | -0.0656(6)  | 0.28(1)  | 1.00    |
| <b>O29</b> | 0.42788(39)  | 0.20216(25)  | 0.0312(12)  | 0.28(1)  | 1.00    |
| <b>O30</b> | 0.44687(64)  | 0.09561(68)  | -0.0751(8)  | 0.28(1)  | 1.00    |
| <b>O31</b> | 0.43517(45)  | 0.12041(38)  | -0.2655(11) | 0.28(1)  | 1.00    |
| <b>O32</b> | 0.44467(45)  | 0.24768(47)  | -0.2346(9)  | 0.28(1)  | 1.00    |
| <b>O33</b> | 0.66809(35)  | 0.37384(57)  | -0.2165(8)  | 0.28(1)  | 1.00    |
| <b>O34</b> | 0.64524(43)  | 0.31013(47)  | -0.0507(6)  | 0.28(1)  | 1.00    |
| <b>O35</b> | 0.65861(44)  | 0.19464(21)  | 0.0352(11)  | 0.28(1)  | 1.00    |
| <b>O36</b> | 0.65966(59)  | 0.08921(63)  | -0.0776(6)  | 0.28(1)  | 1.00    |
| <b>O37</b> | 0.66721(44)  | 0.11938(43)  | -0.2662(8)  | 0.28(1)  | 1.00    |
| <b>O38</b> | 0.66425(68)  | 0.24440(56)  | -0.2156(8)  | 0.28(1)  | 1.00    |
| <b>O39</b> | 0.55439(25)  | 0.31252(61)  | -0.1919(9)  | 0.28(1)  | 1.00    |
| <b>O40</b> | 0.55179(22)  | 0.08849(46)  | -0.1893(12) | 0.28(1)  | 1.00    |
| <b>O41</b> | 0.37342(24)  | 0.41421(52)  | -0.3868(8)  | 0.28(1)  | 1.00    |
| <b>O42</b> | 0.50343(27)  | 0.40376(58)  | -0.3997(9)  | 0.28(1)  | 1.00    |
| <b>O43</b> | 0.63324(28)  | 0.38812(37)  | -0.4034(7)  | 0.28(1)  | 1.00    |
| <b>O44</b> | 0.37565(32)  | 0.20353(22)  | -0.3867(9)  | 0.28(1)  | 1.00    |
| <b>O45</b> | 0.50597(30)  | 0.19374(58)  | -0.3853(9)  | 0.28(1)  | 1.00    |
| <b>O46</b> | 0.63532(29)  | 0.20936(41)  | -0.3982(7)  | 0.28(1)  | 1.00    |
| <b>O47</b> | 0.45735(46)  | -0.00039(34) | -0.2044(6)  | 0.28(1)  | 1.00    |
| <b>O48</b> | 0.64327(39)  | -0.00273(36) | -0.2125(7)  | 0.28(1)  | 1.00    |
| <b>C2b</b> | 0.7173(56)   | 0.5043(87)   | 0.206(4)    | 10.35(7) | 1.00(1) |
| <b>C1b</b> | 0.7391(30)   | 0.5103(27)   | 0.104(4)    | 10.35(7) | 1.00(1) |
| <b>C4b</b> | 0.2389(81)   | 0.4223(45)   | -0.085(11)  | 10.35(7) | 1.00(1) |
| <b>O1b</b> | 0.68383(32)  | 0.49424(58)  | 0.0368(54)  | 10.35(7) | 1.00(1) |
| <b>C3b</b> | 0.7942(56)   | 0.4650(77)   | 0.086(11)   | 10.35(7) | 1.00(1) |
| <b>C5b</b> | 0.6541(51)   | 0.5215(82)   | -0.049(8)   | 10.35(7) | 1.00(1) |
| <b>C1a</b> | 0.7703(92)   | 0.7131(72)   | 0.106(10)   | 11.32(6) | 0.50(1) |
| <b>C2a</b> | 0.7731(57)   | 0.6754(65)   | 0.198(19)   | 11.32(6) | 0.50(1) |
| <b>c3a</b> | 0.8128(71)   | 0.6819(86)   | 0.032(25)   | 11.32(6) | 0.50(1) |
| <b>C4a</b> | 0.7936(73)   | 0.7801(10)   | 0.124(29)   | 11.32(6) | 0.50(1) |
| <b>O5a</b> | 0.7018(85)   | 0.7150(82)   | 0.0687(18)  | 11.32(6) | 0.50(1) |
| <b>C6a</b> | 0.6566(57)   | 0.7030(54)   | 0.146(26)   | 11.32(6) | 0.50(1) |
| <b>w</b>   | 0.7885(33)   | 0.3762(24)   | 0.1888(25)  | 7.57(3)  | 0.98(8) |

Table 2 SI. Atomic coordinates, fractions and thermal parameters of Y-MTBE.

|       | <b>x/a</b> | <b>y/b</b> | <b>z/c</b>  | <b>U<sub>i</sub>/U<sub>e</sub>*100</b> | <b>Fraction</b> |
|-------|------------|------------|-------------|----------------------------------------|-----------------|
| T1    | -0.0521(4) | 0.1279(6)  | 0.0350(5)   | 0.67(1)                                | 1.00            |
| T2    | -0.0575(4) | 0.0370(5)  | 0.1244(6)   | 0.67(1)                                | 1.00            |
| O1    | -0.1100(6) | 0.0008(9)  | 0.1054(8)   | 0.85(1)                                | 1.00            |
| O2    | -0.0038(4) | 0.0011(5)  | 0.1406(5)   | 0.85(1)                                | 1.00            |
| O3    | -0.0363(5) | 0.0772(6)  | 0.0754(5)   | 0.85(1)                                | 1.00            |
| O4    | -0.0742(4) | 0.0690(5)  | 0.1808(6)   | 0.85(1)                                | 1.00            |
| C1    | 0.500000   | 0.000000   | 0.000000    | 6.25(1)                                | 0.388(8)        |
| C3    | 0.4792(3)  | 0.0958(2)  | 0.0496(3)   | 6.25(1)                                | 0.388(8)        |
| C2/O2 | 0.4771(7)  | 0.0579(4)  | 0.0051(3)   | 6.25(1)                                | 0.388(8)        |
| W     | 0.0667(6)  | 0.6427(3)  | -0.02737(3) | 5.48(2)                                | 0.428(5)        |
